# Supplementary material
Source: PubMed Central journal article supplement (PMC2229852)

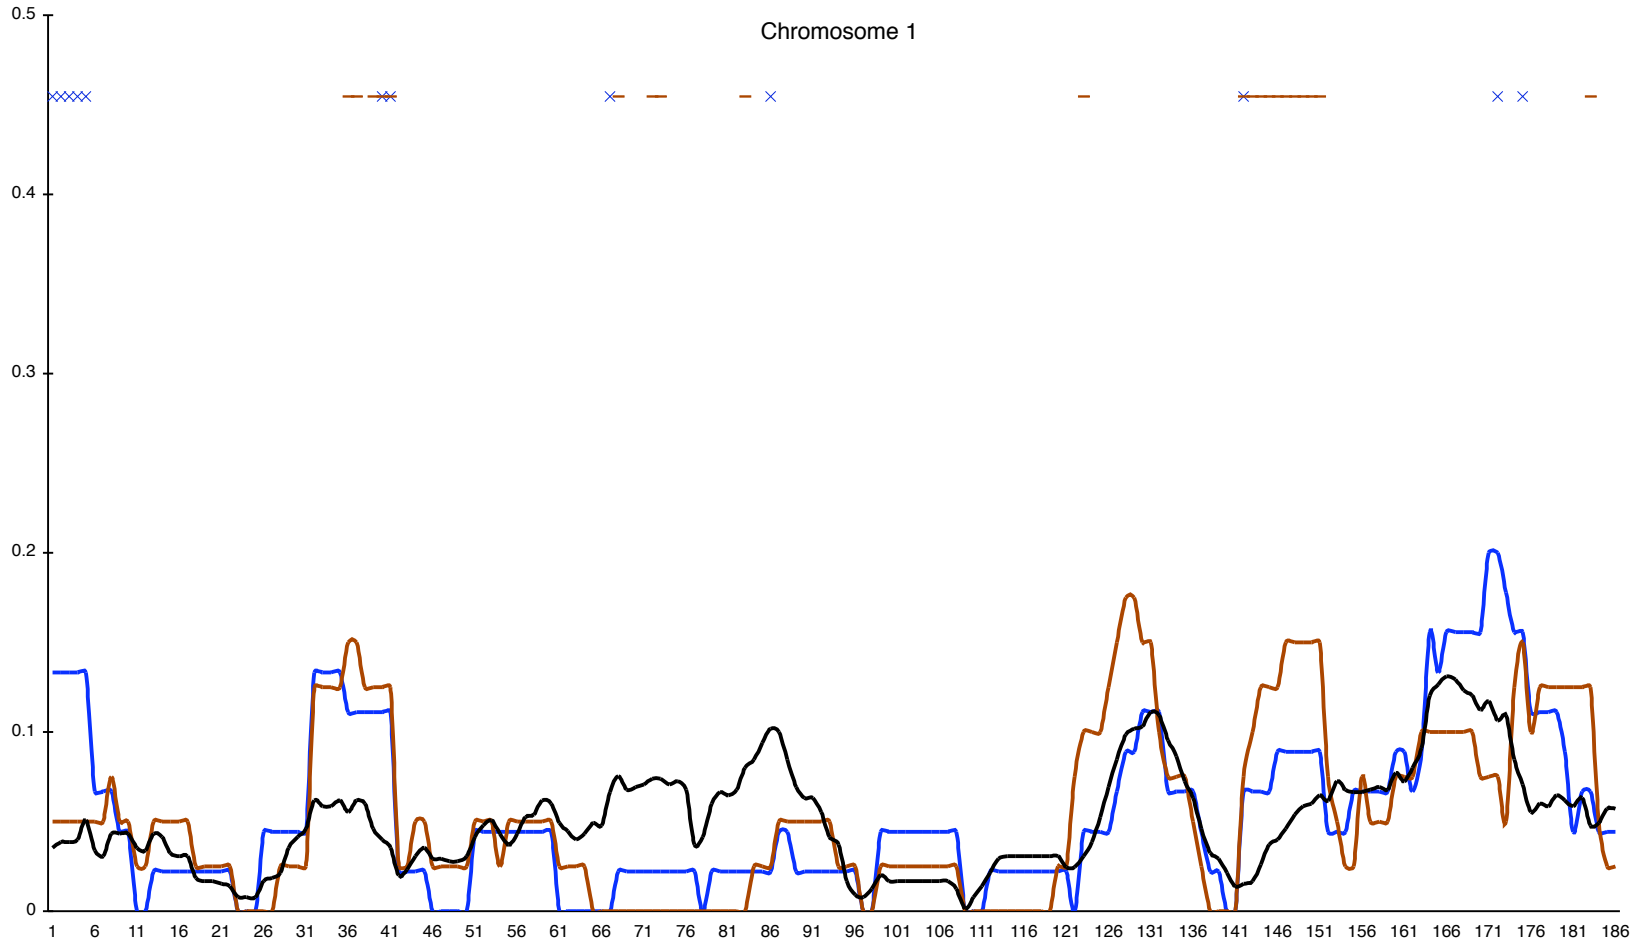

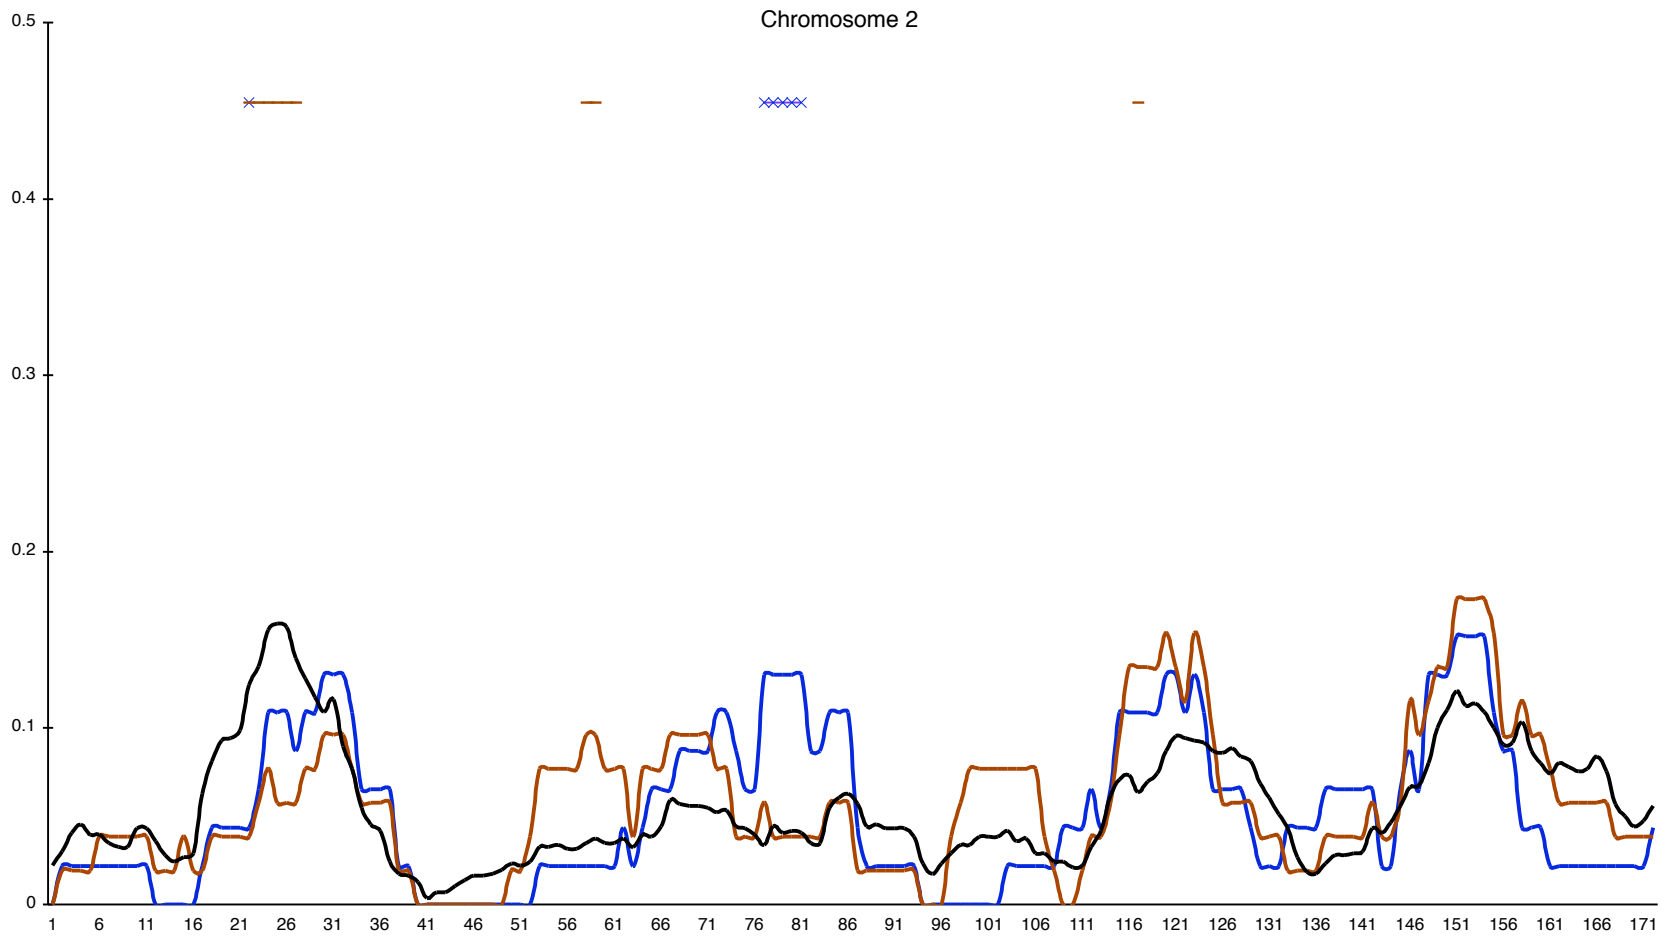

Chromosome 3

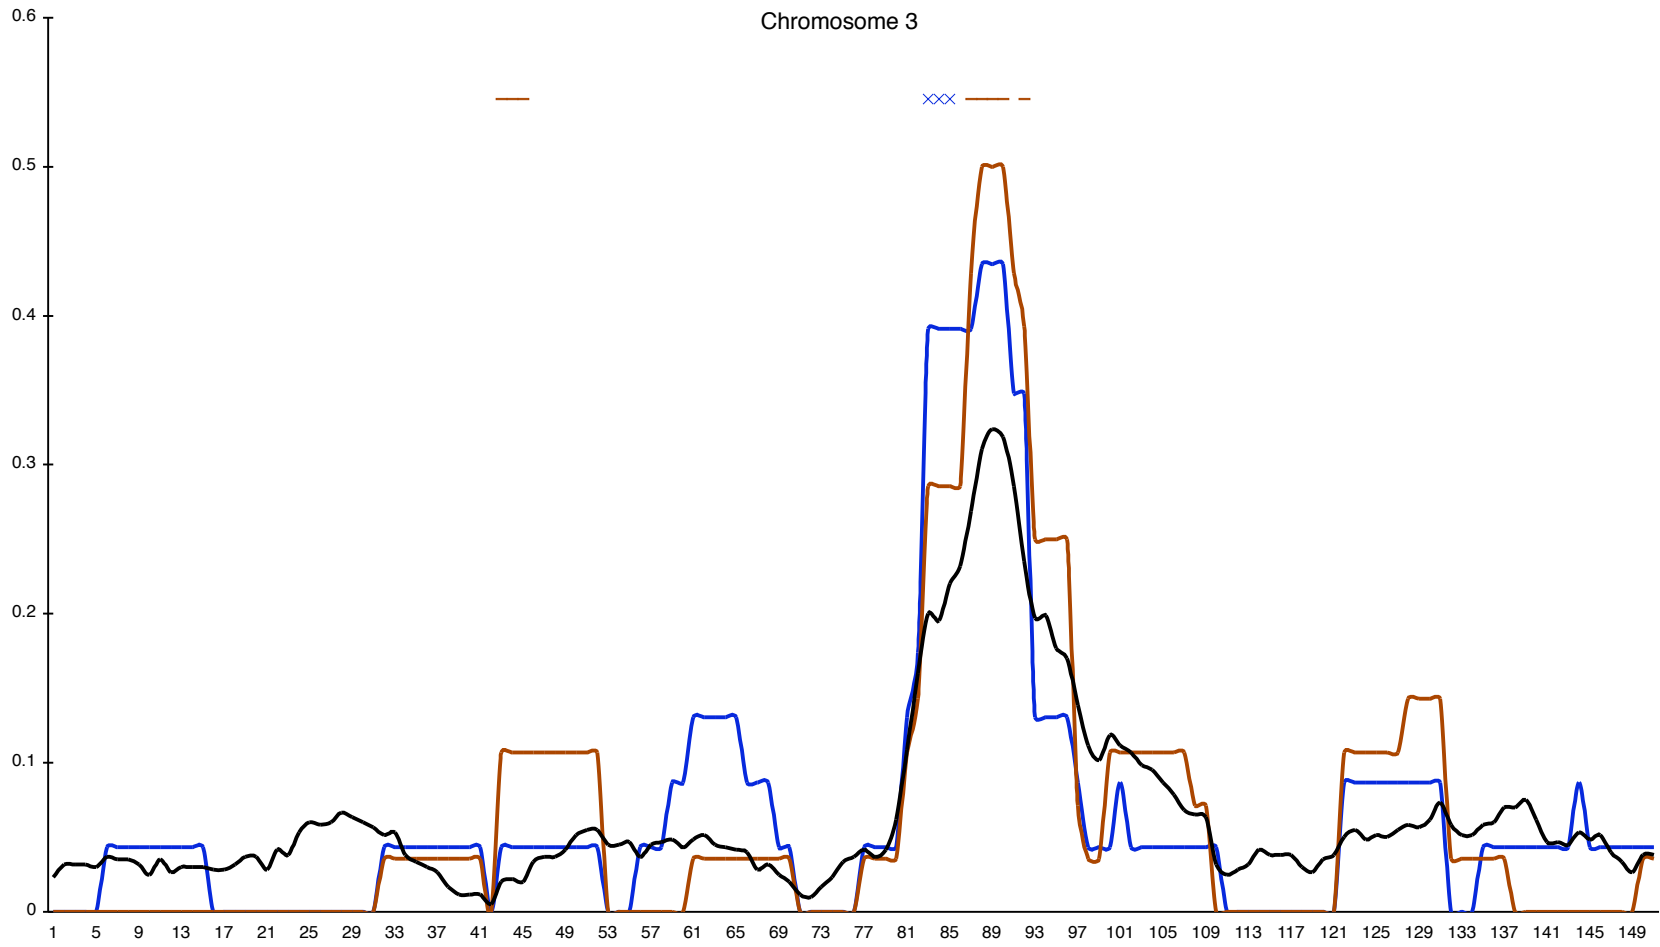

Chromosome 4

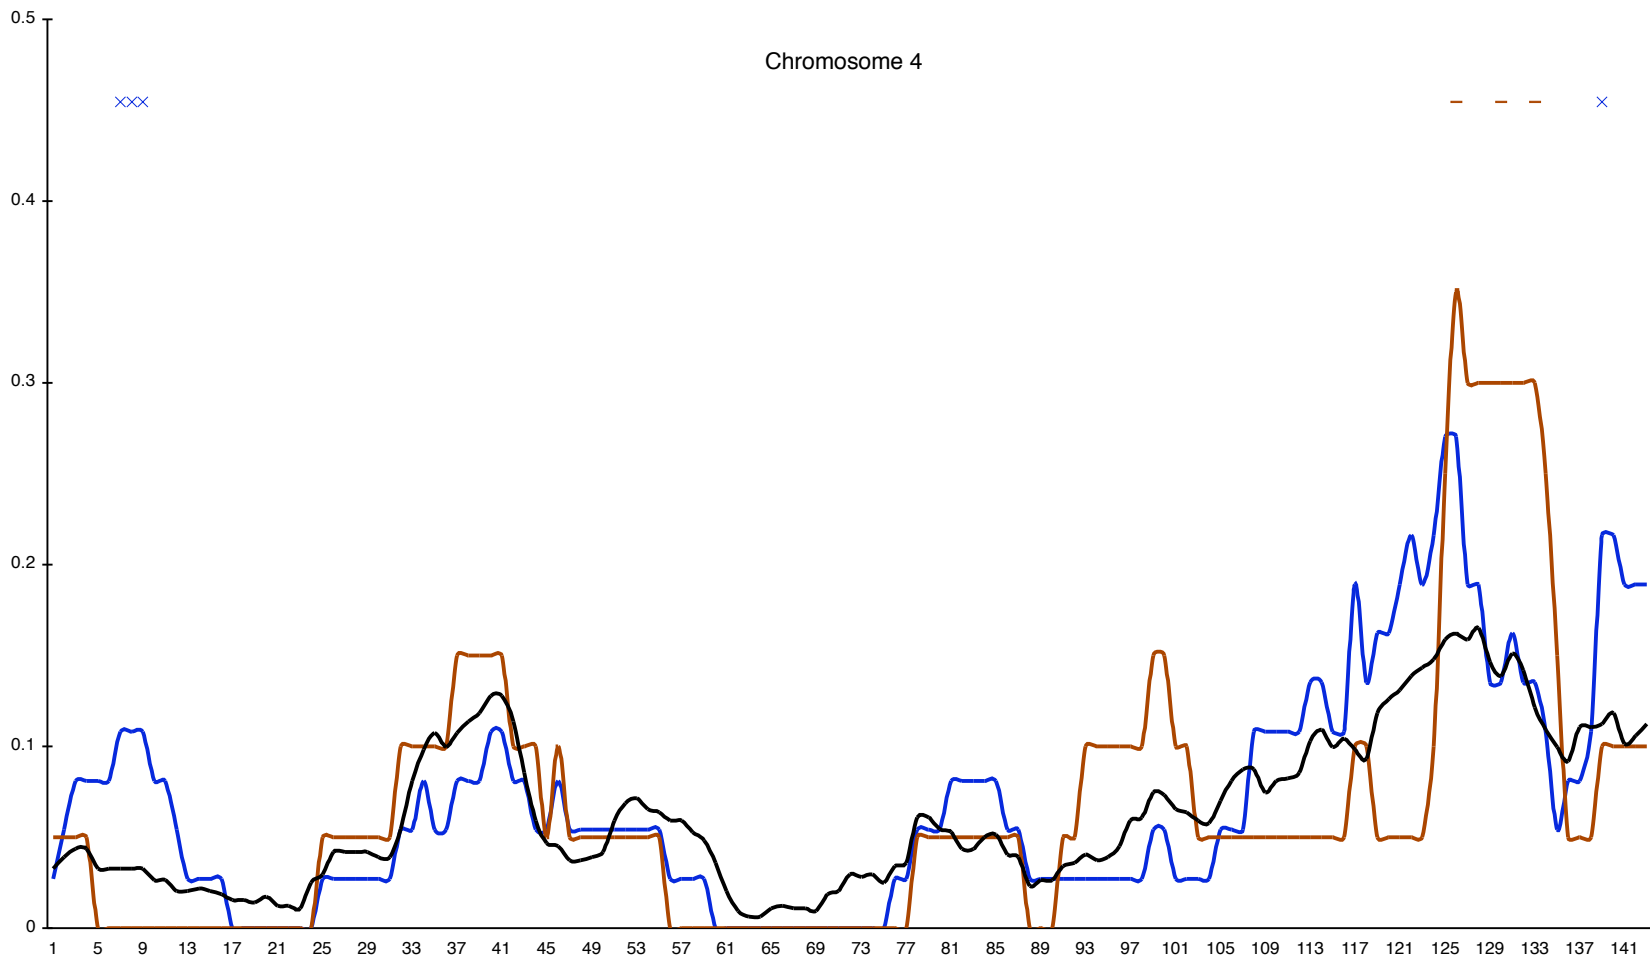

Chromosome 5

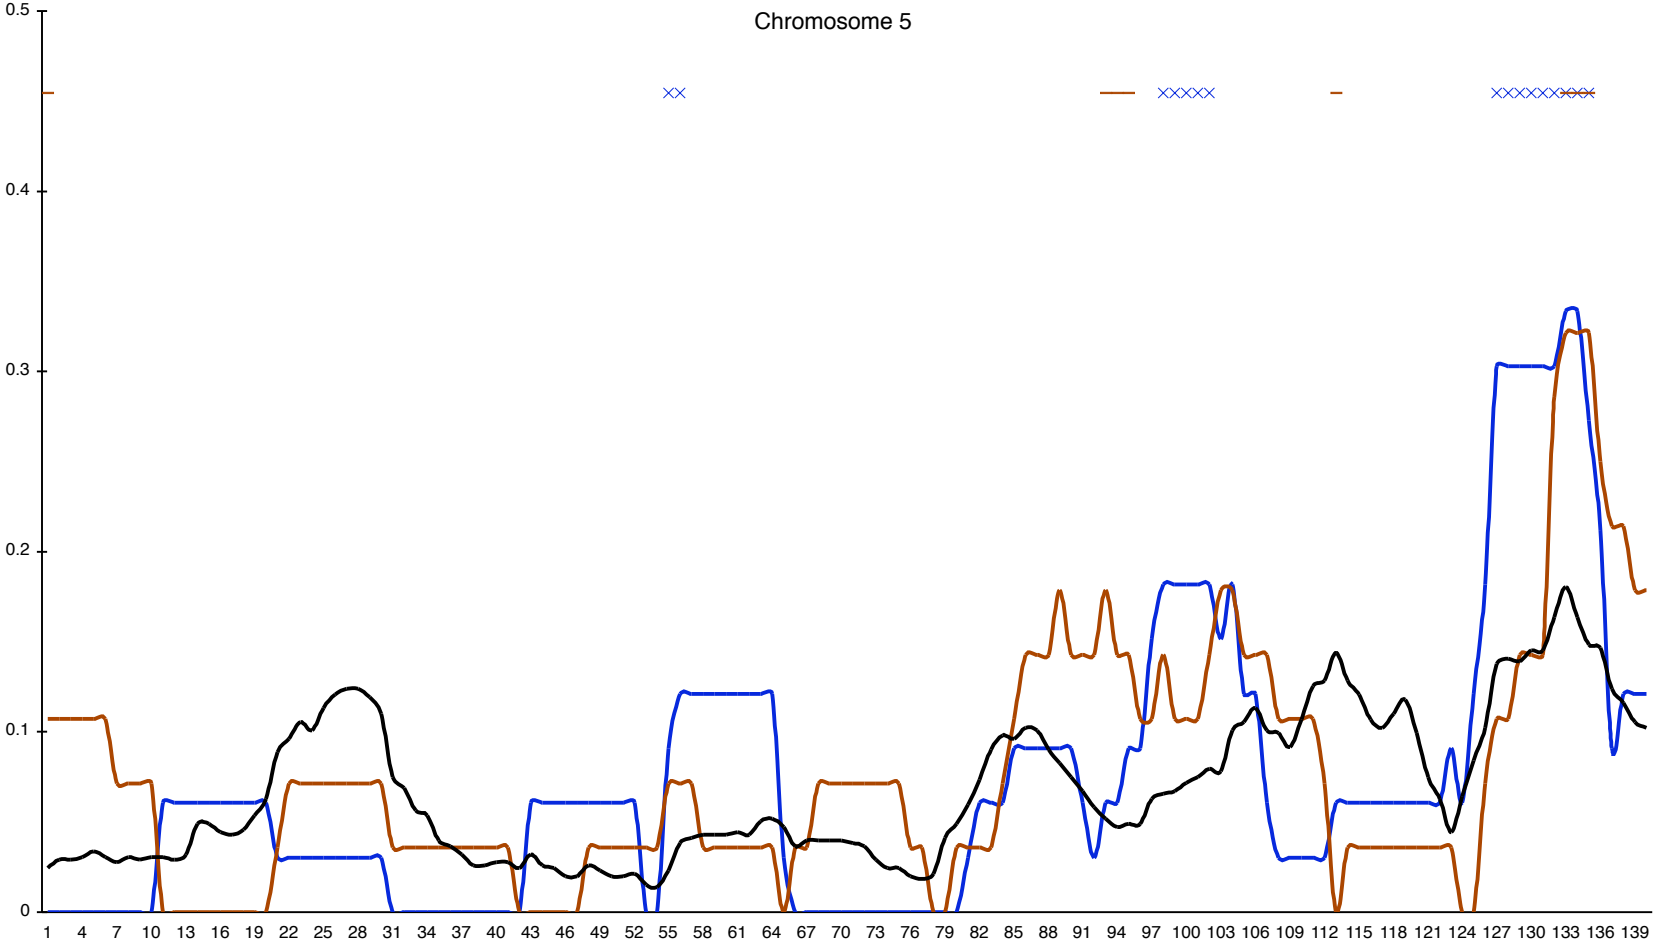

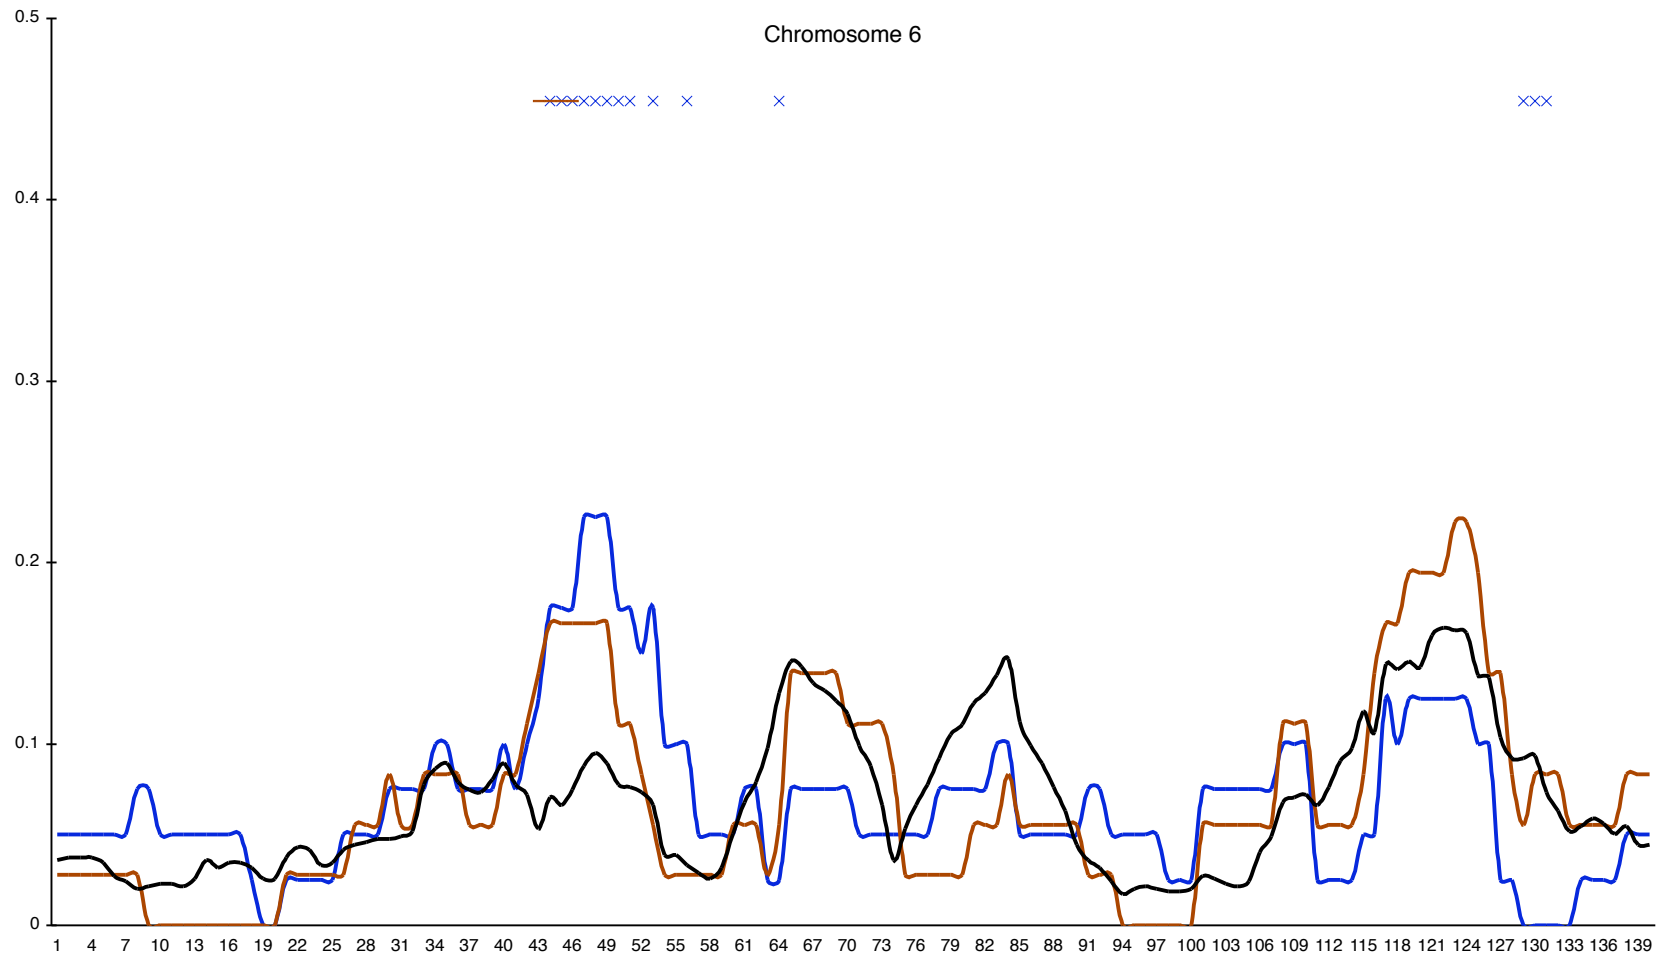

Chromosome 7

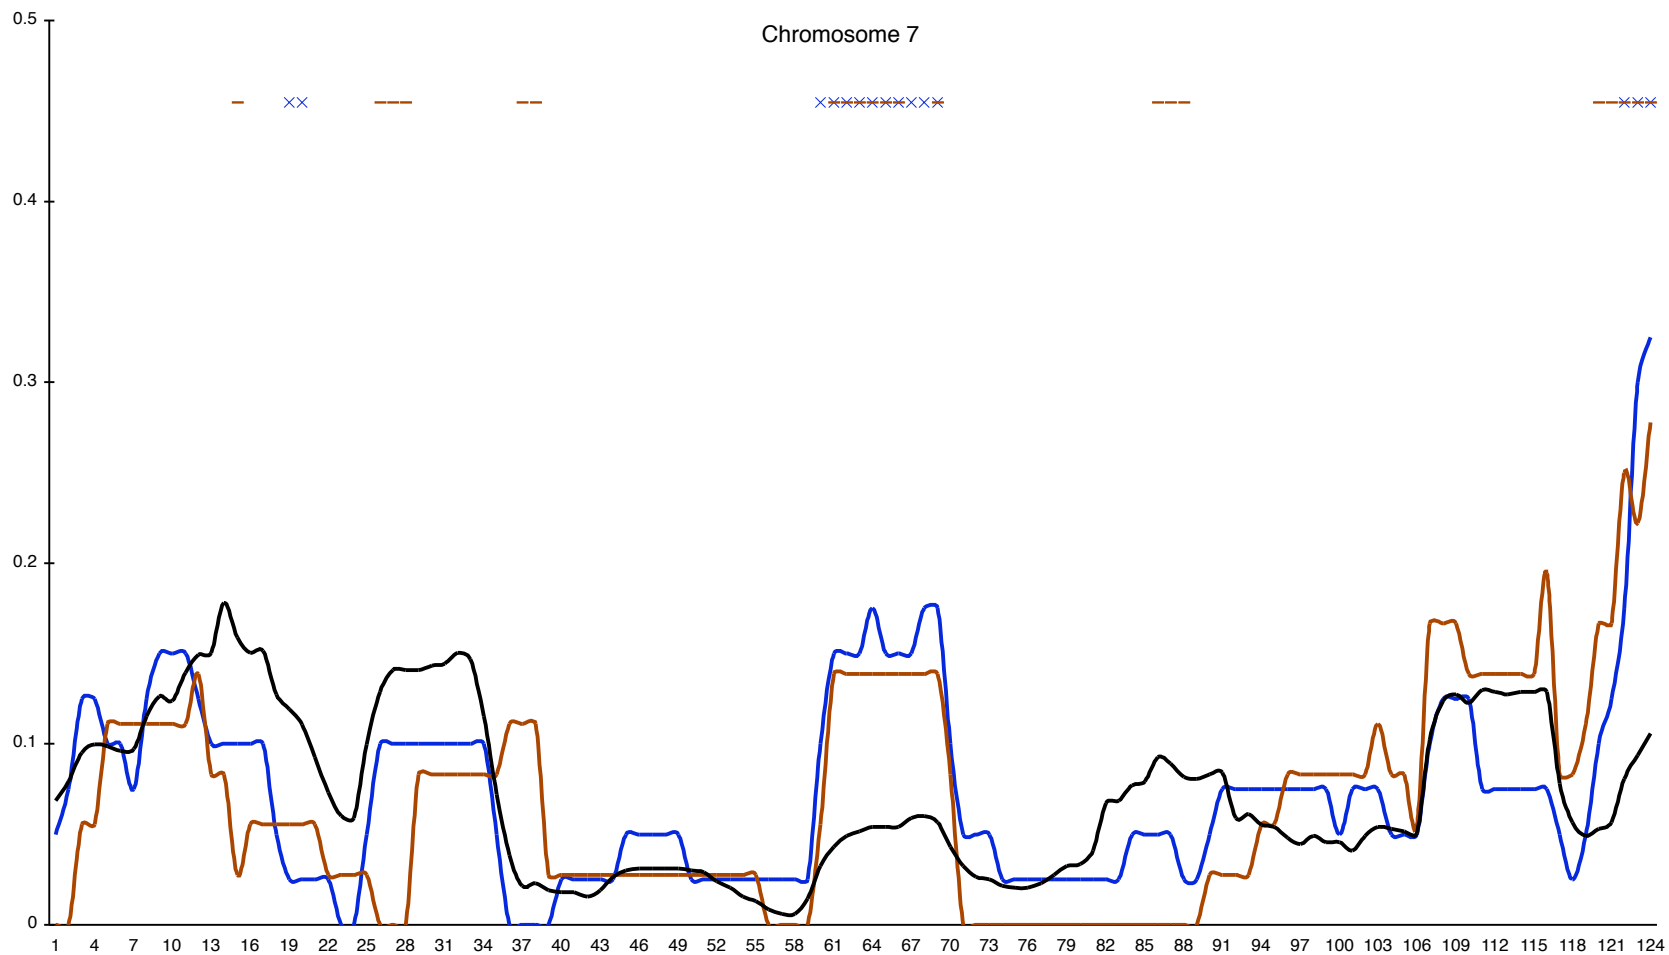

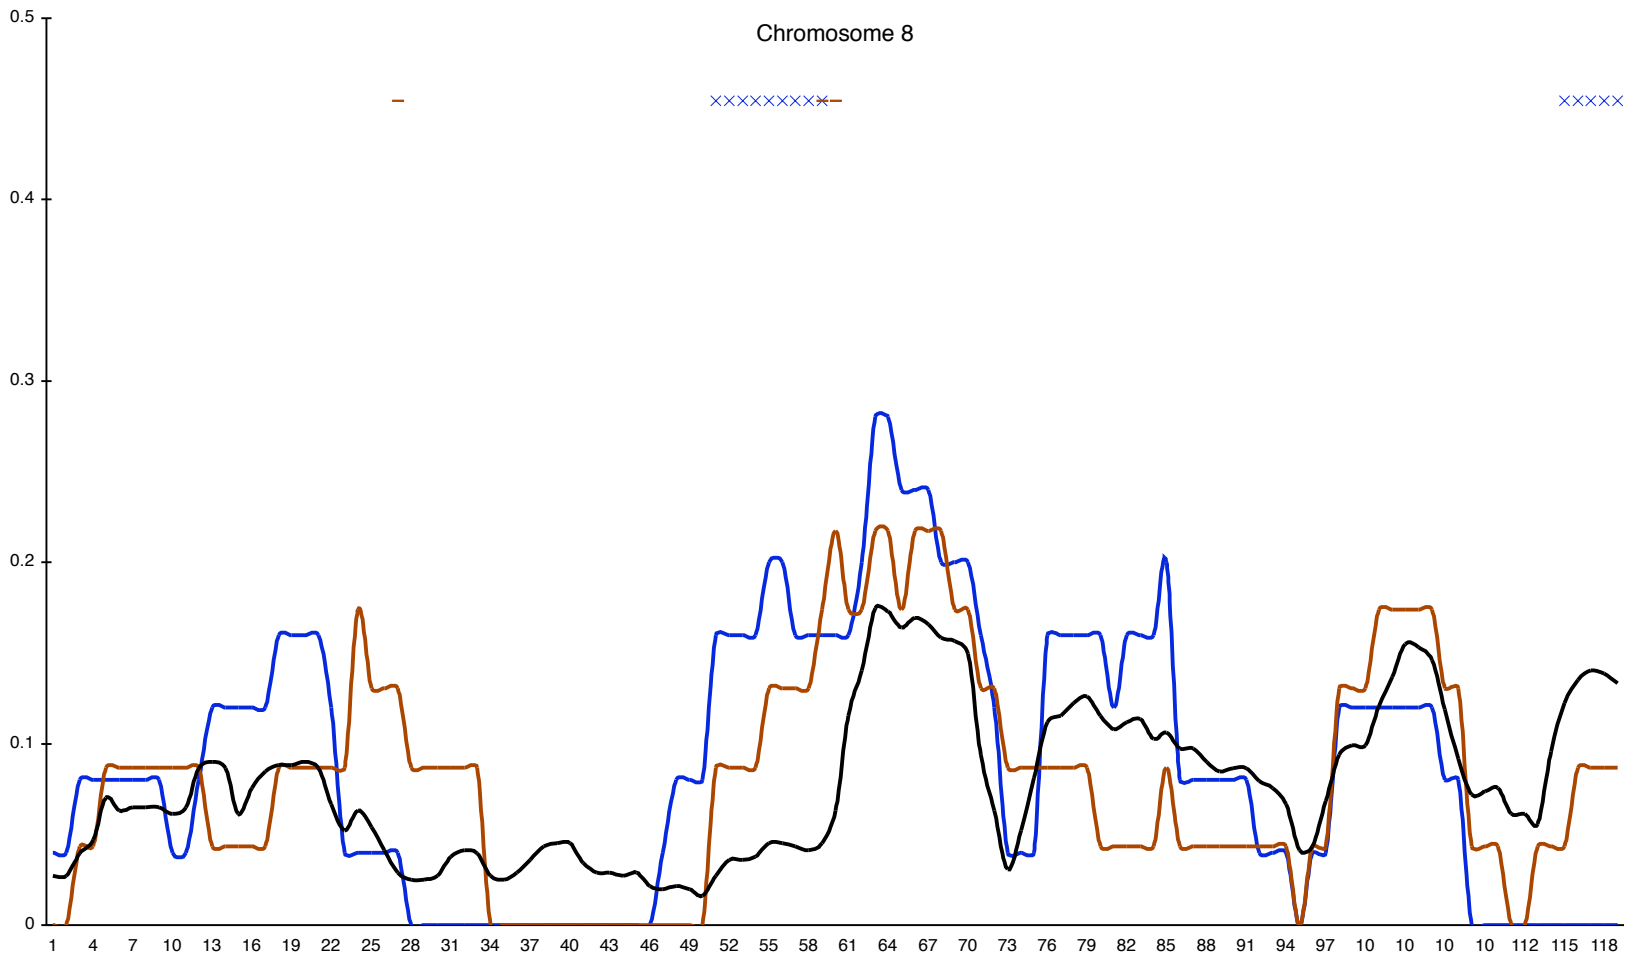



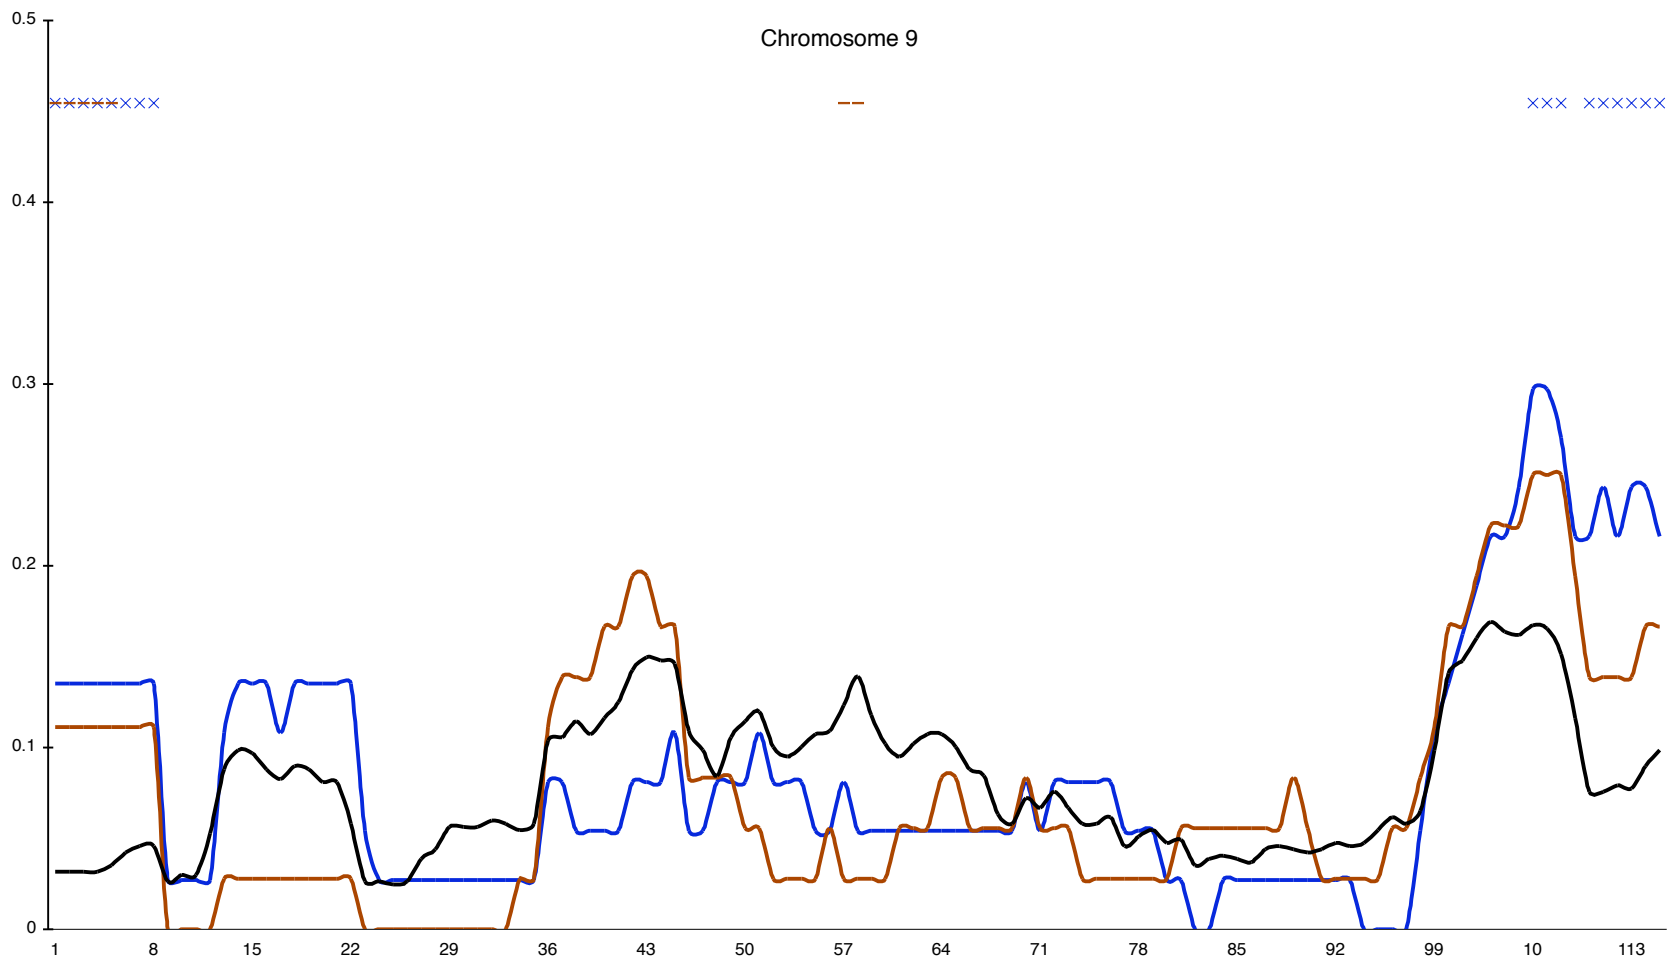

Chromosome 10

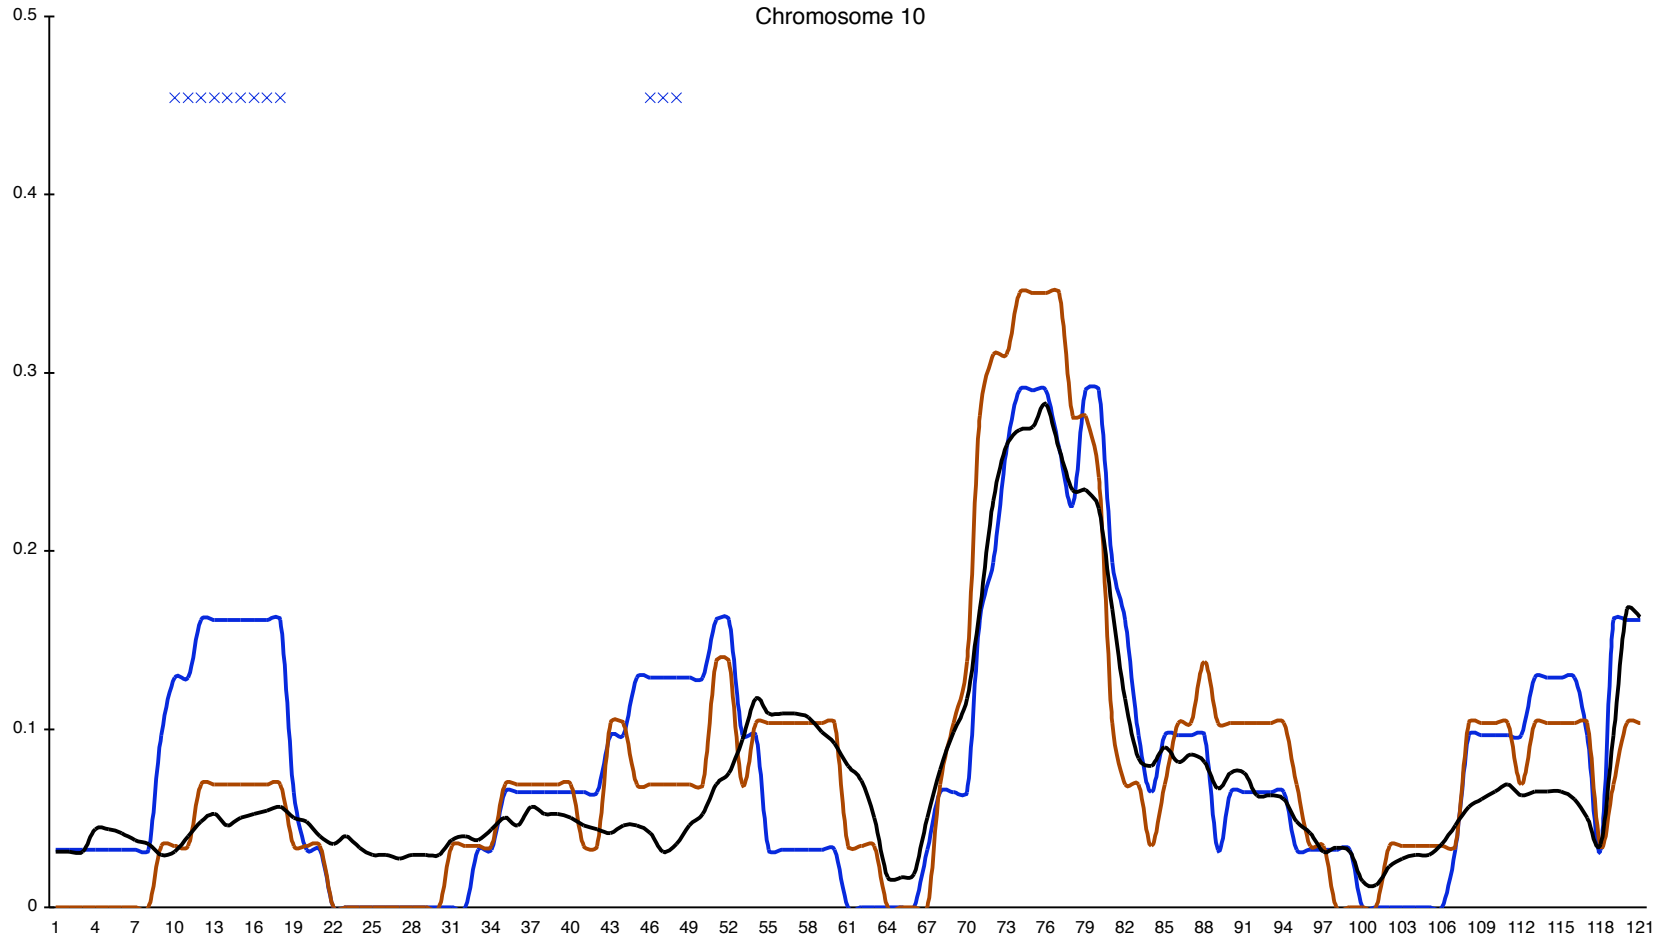

Chromosome 11

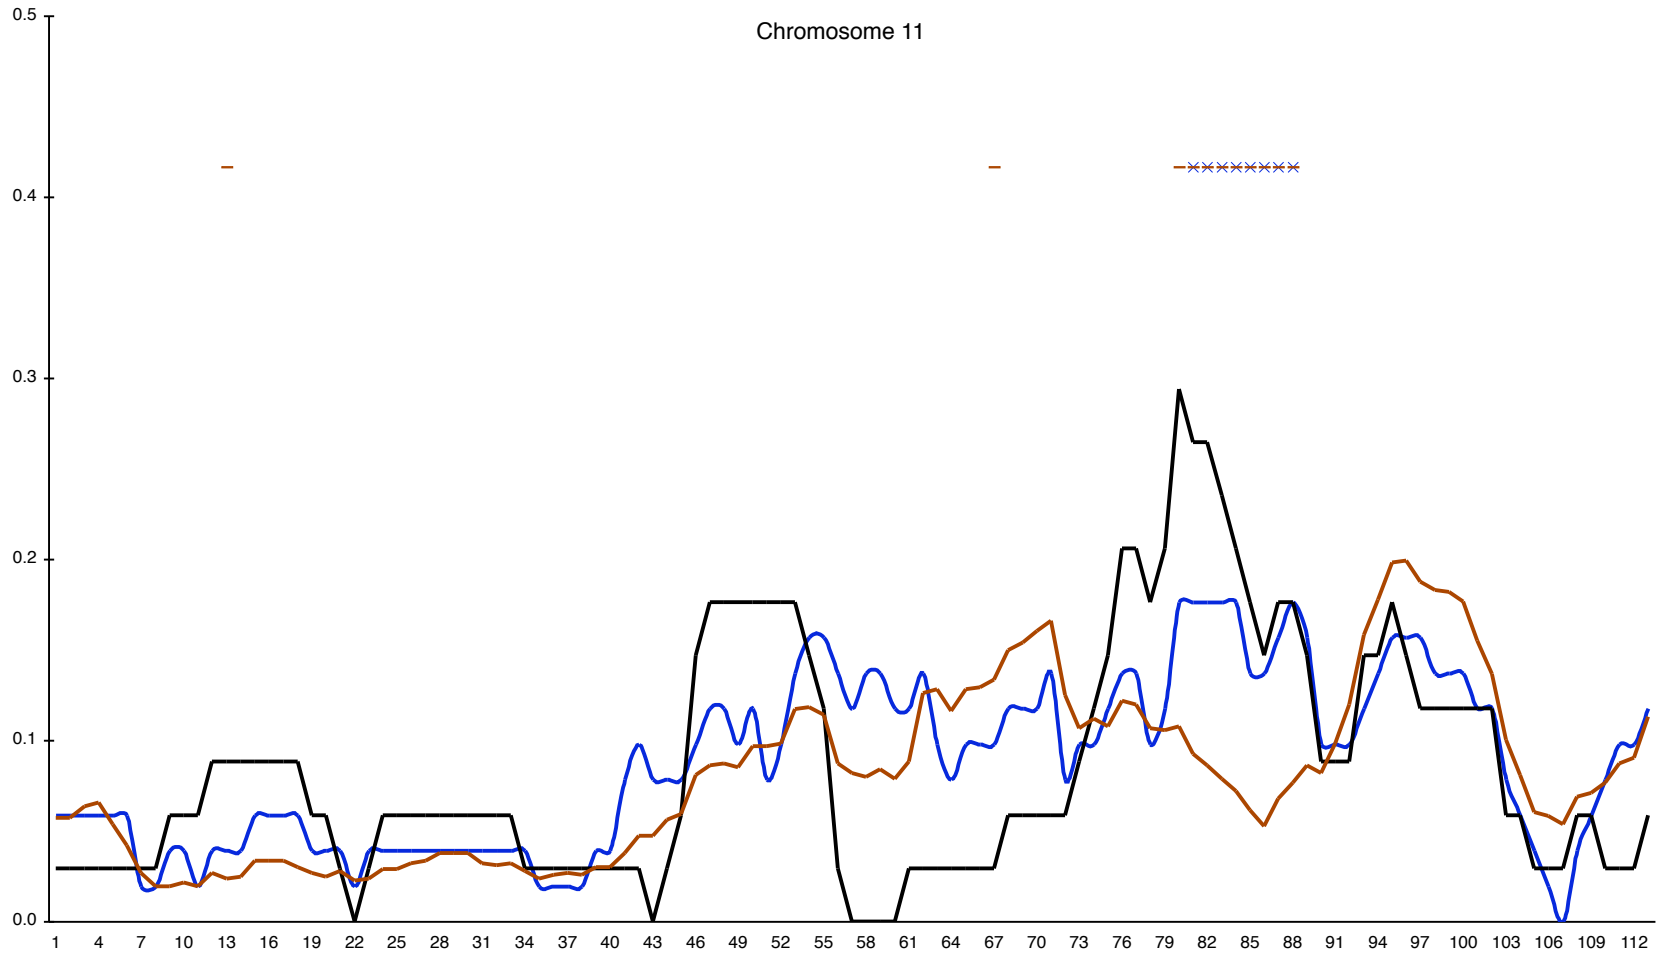

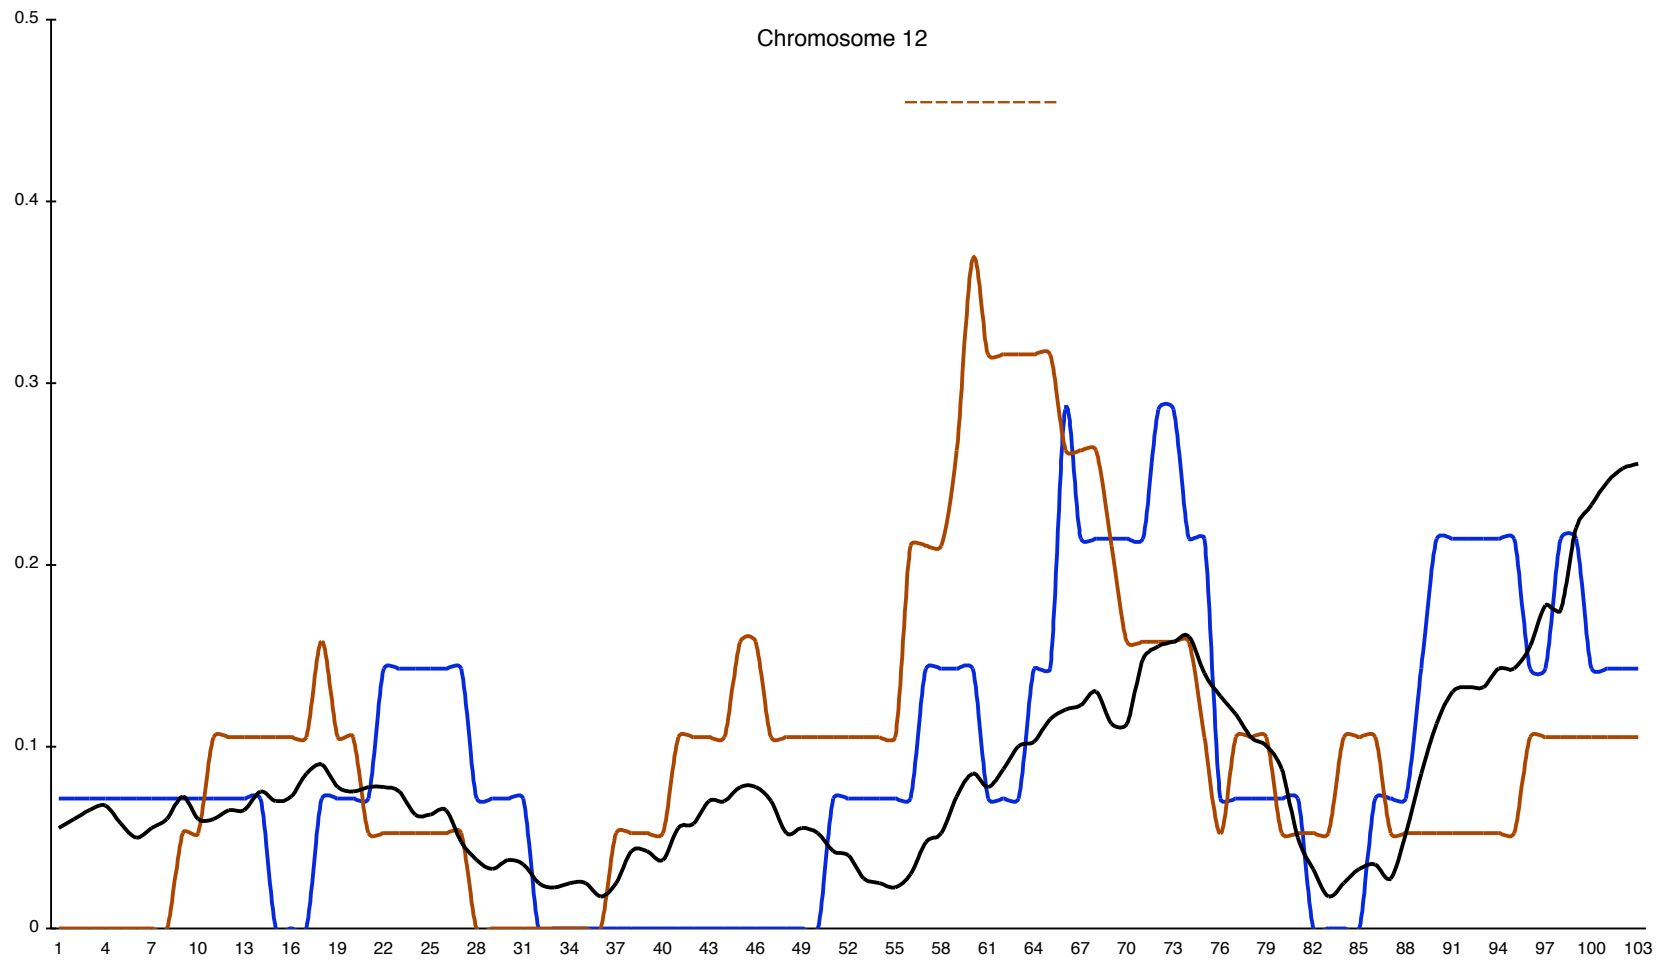

Chromosome 13

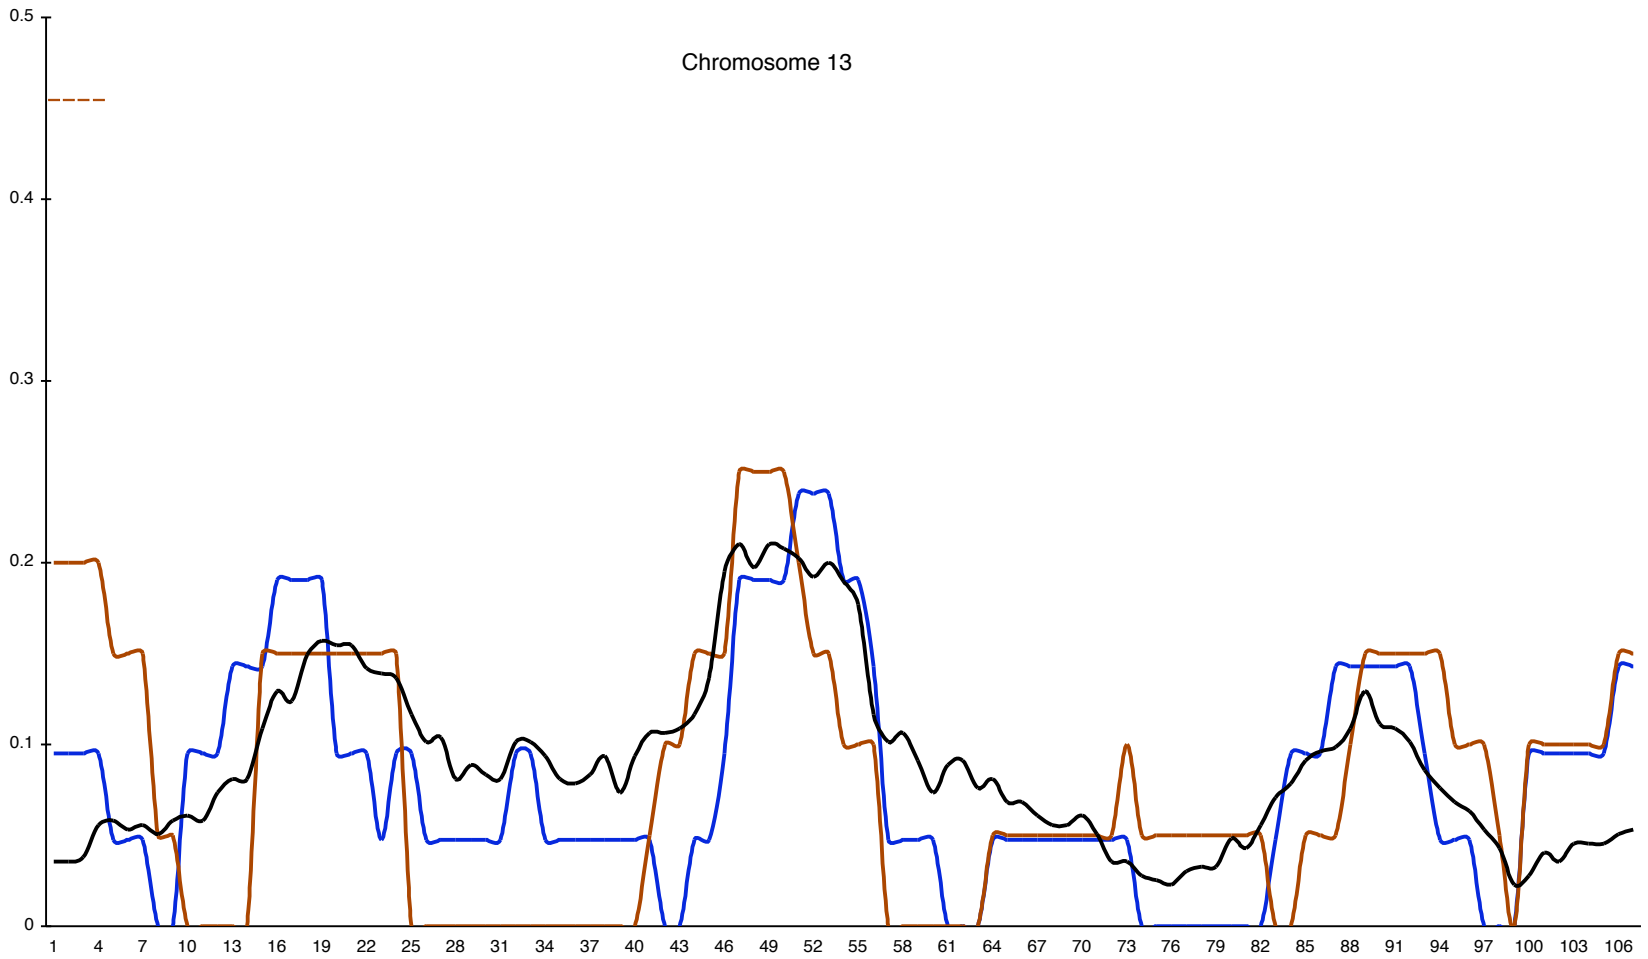

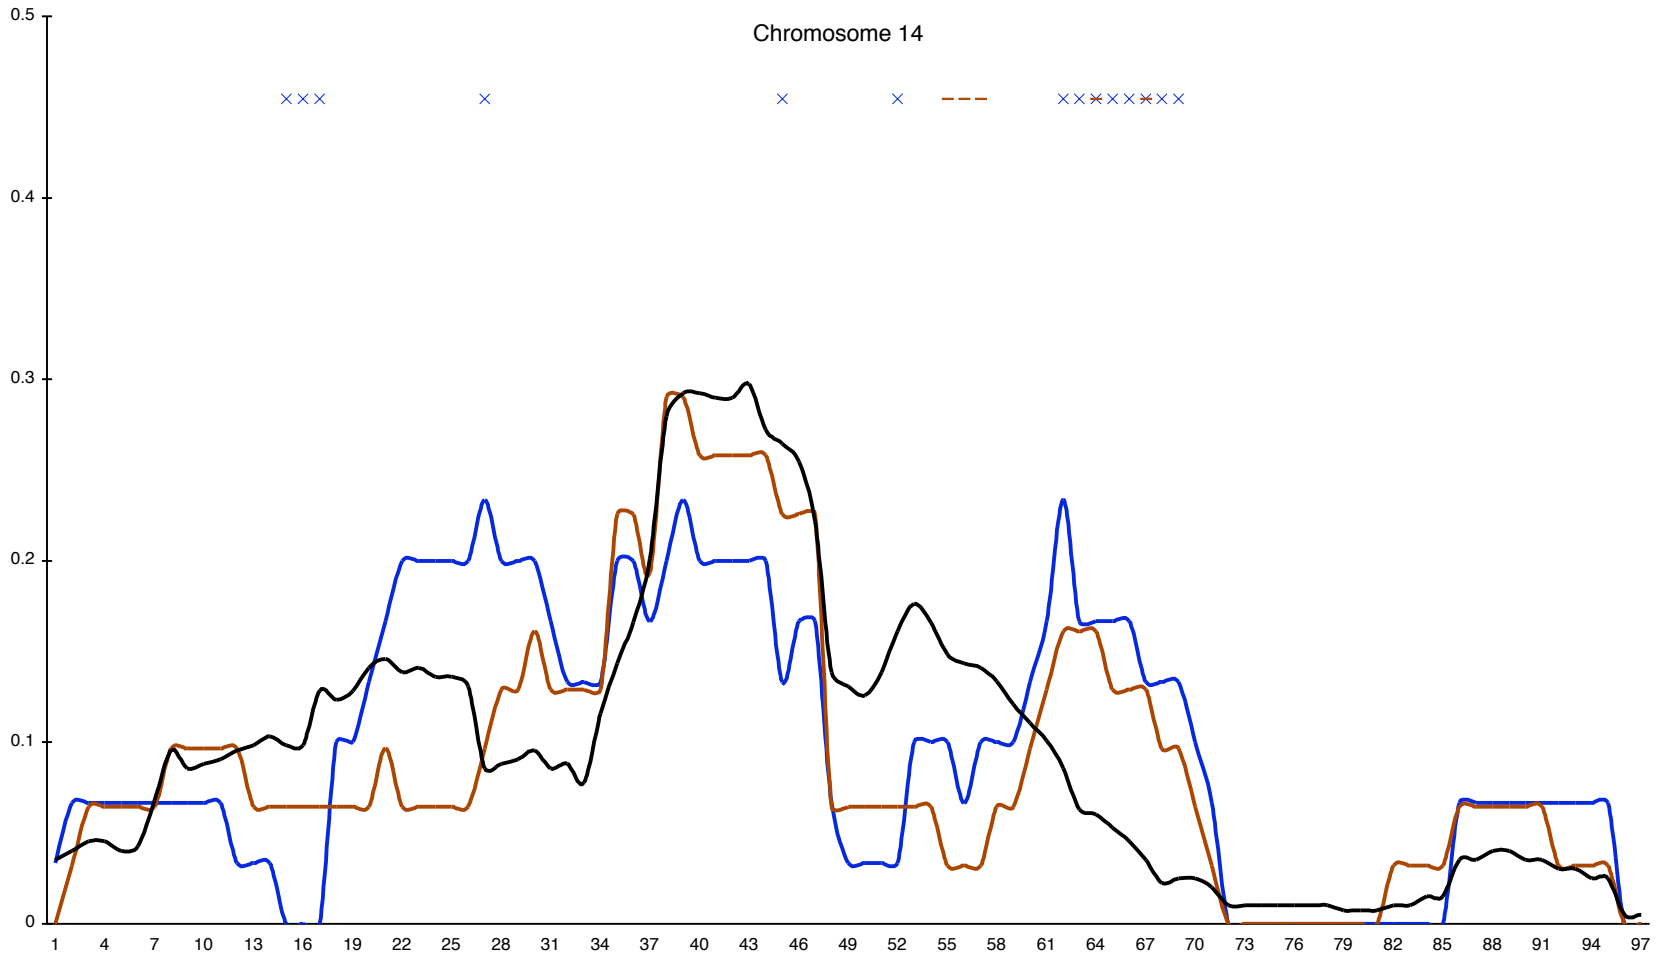

Chromosome 15

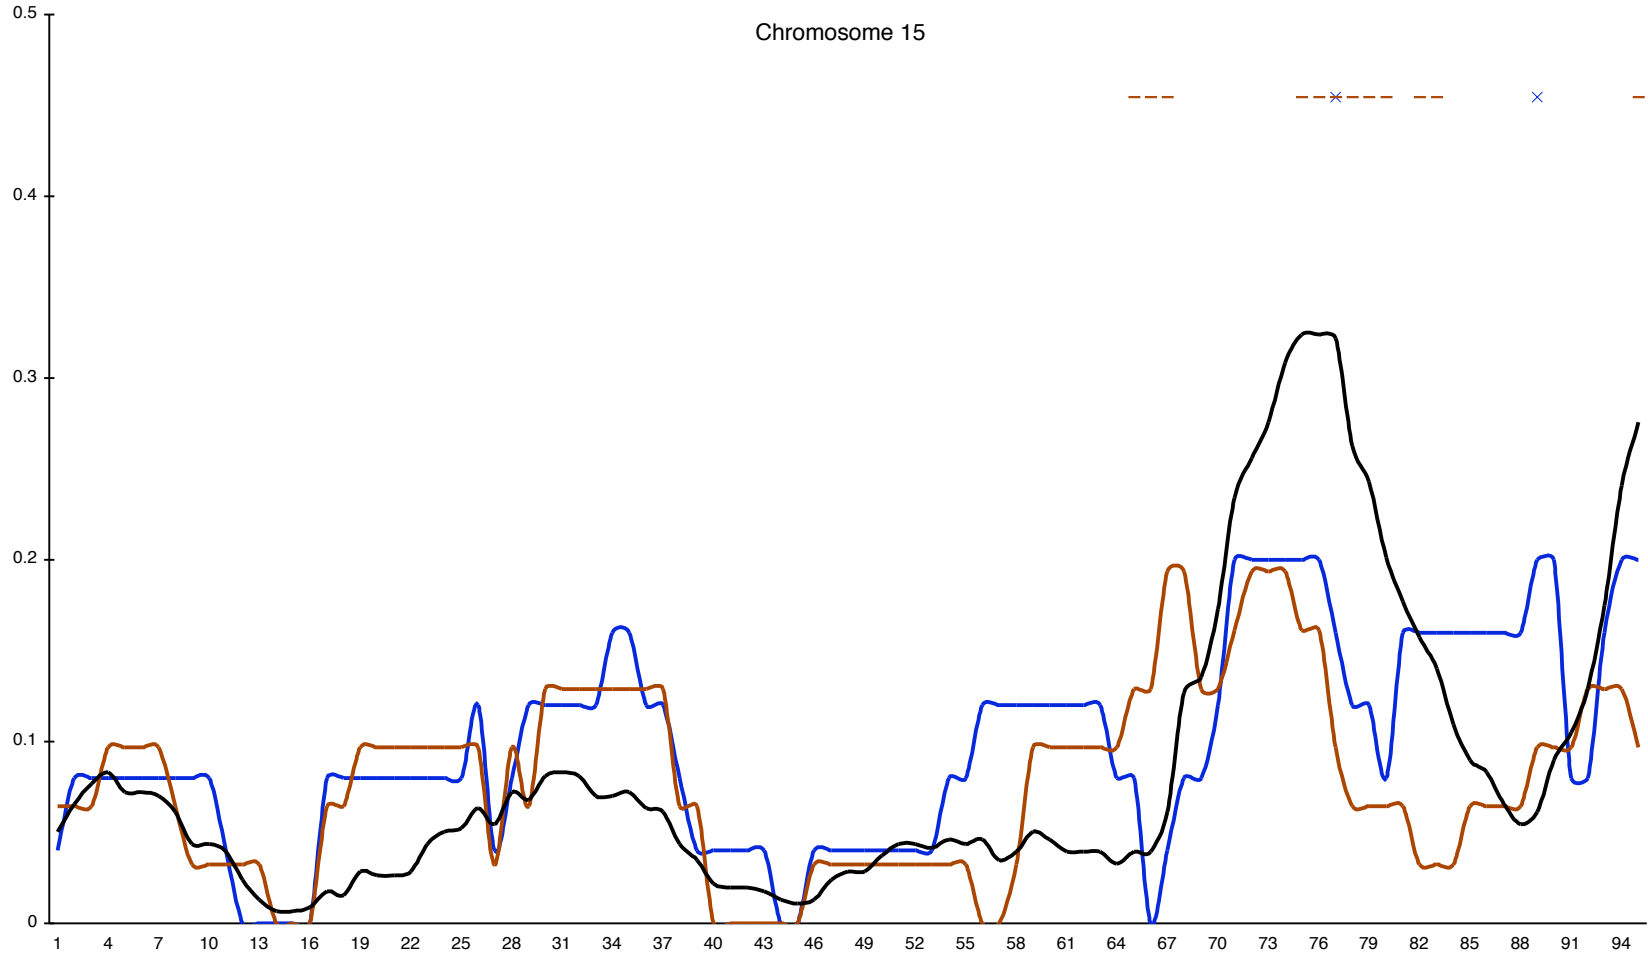

Chromosome 16

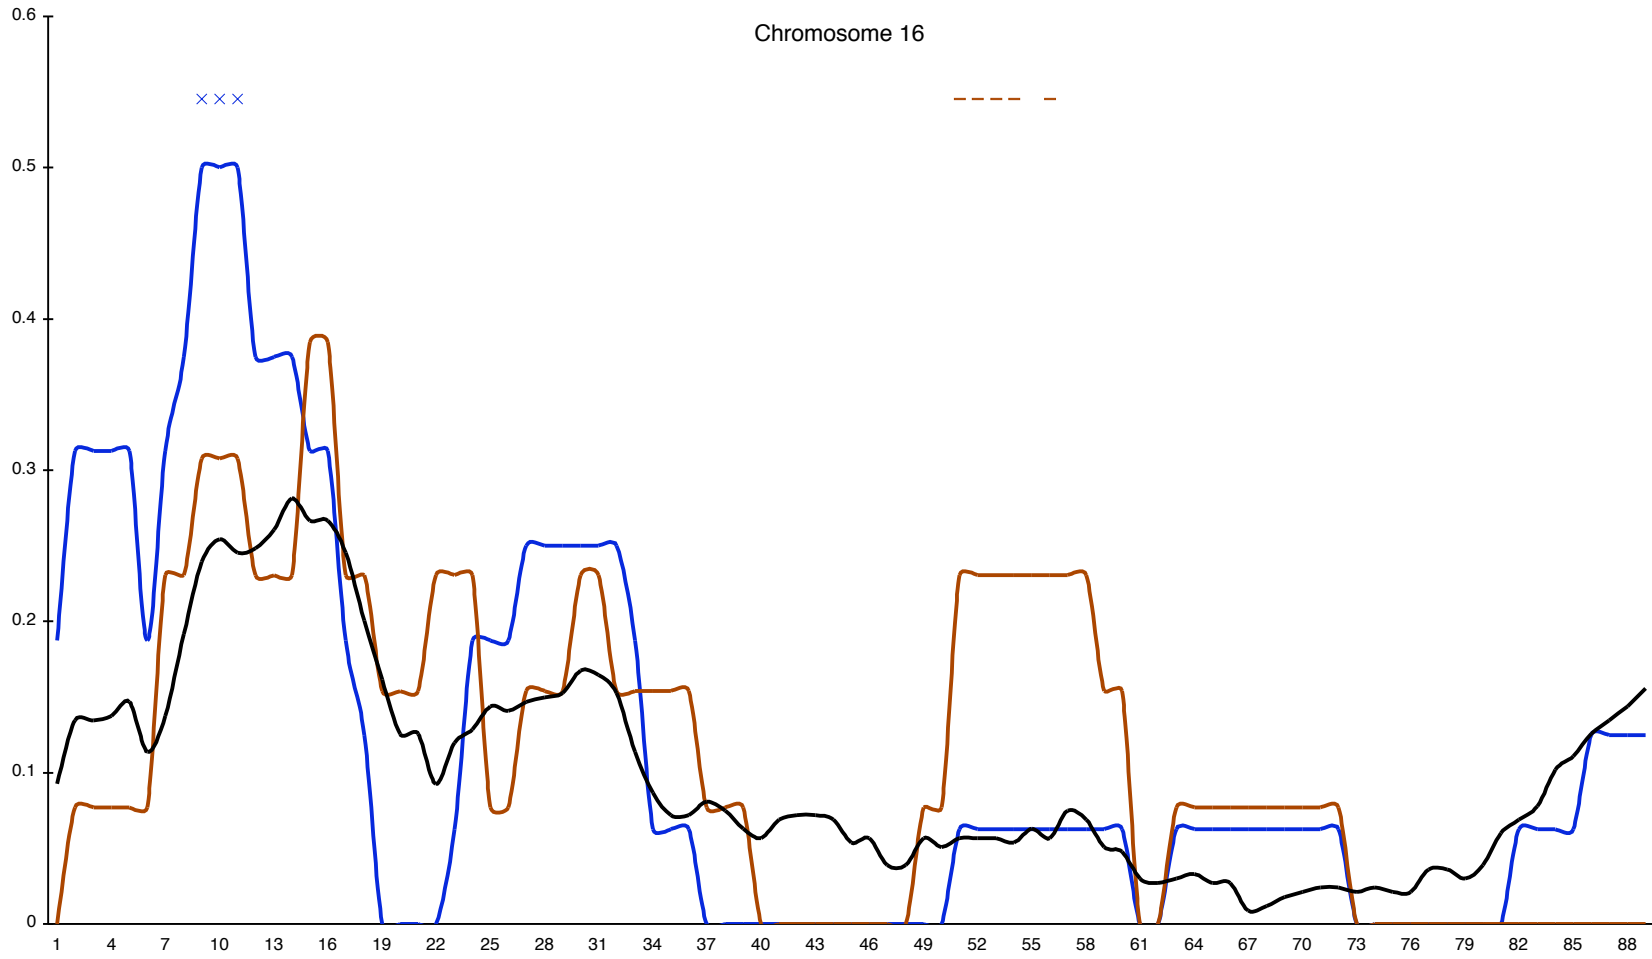



Chromosome 17

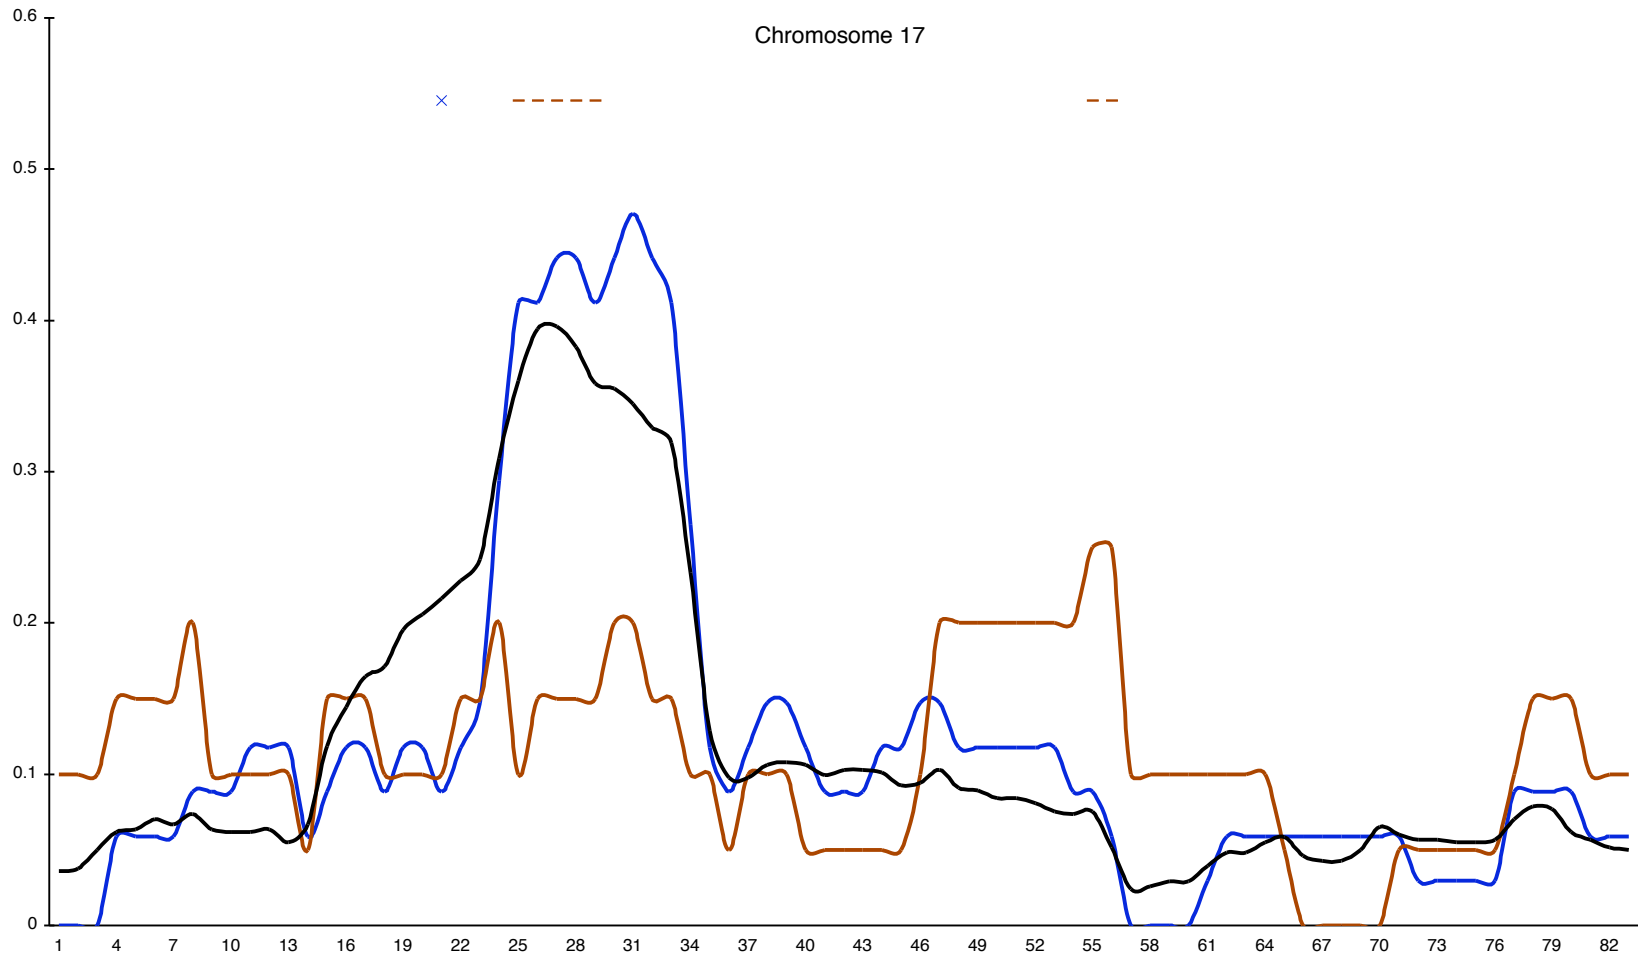

Chromosome 18

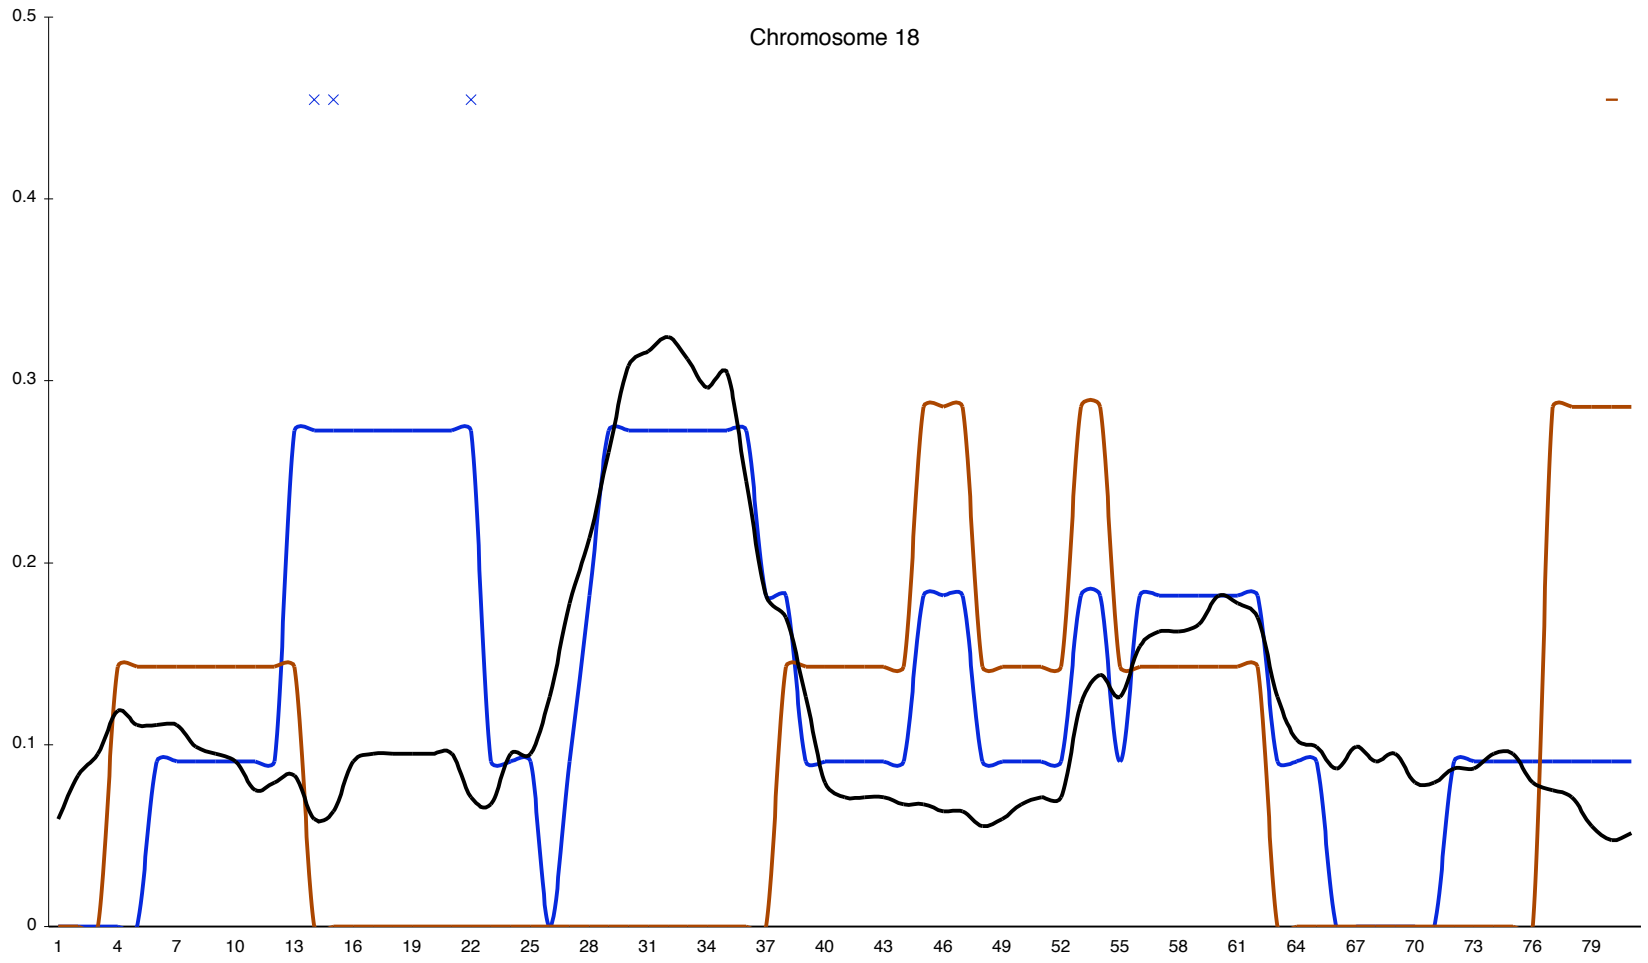

Chromosome 19

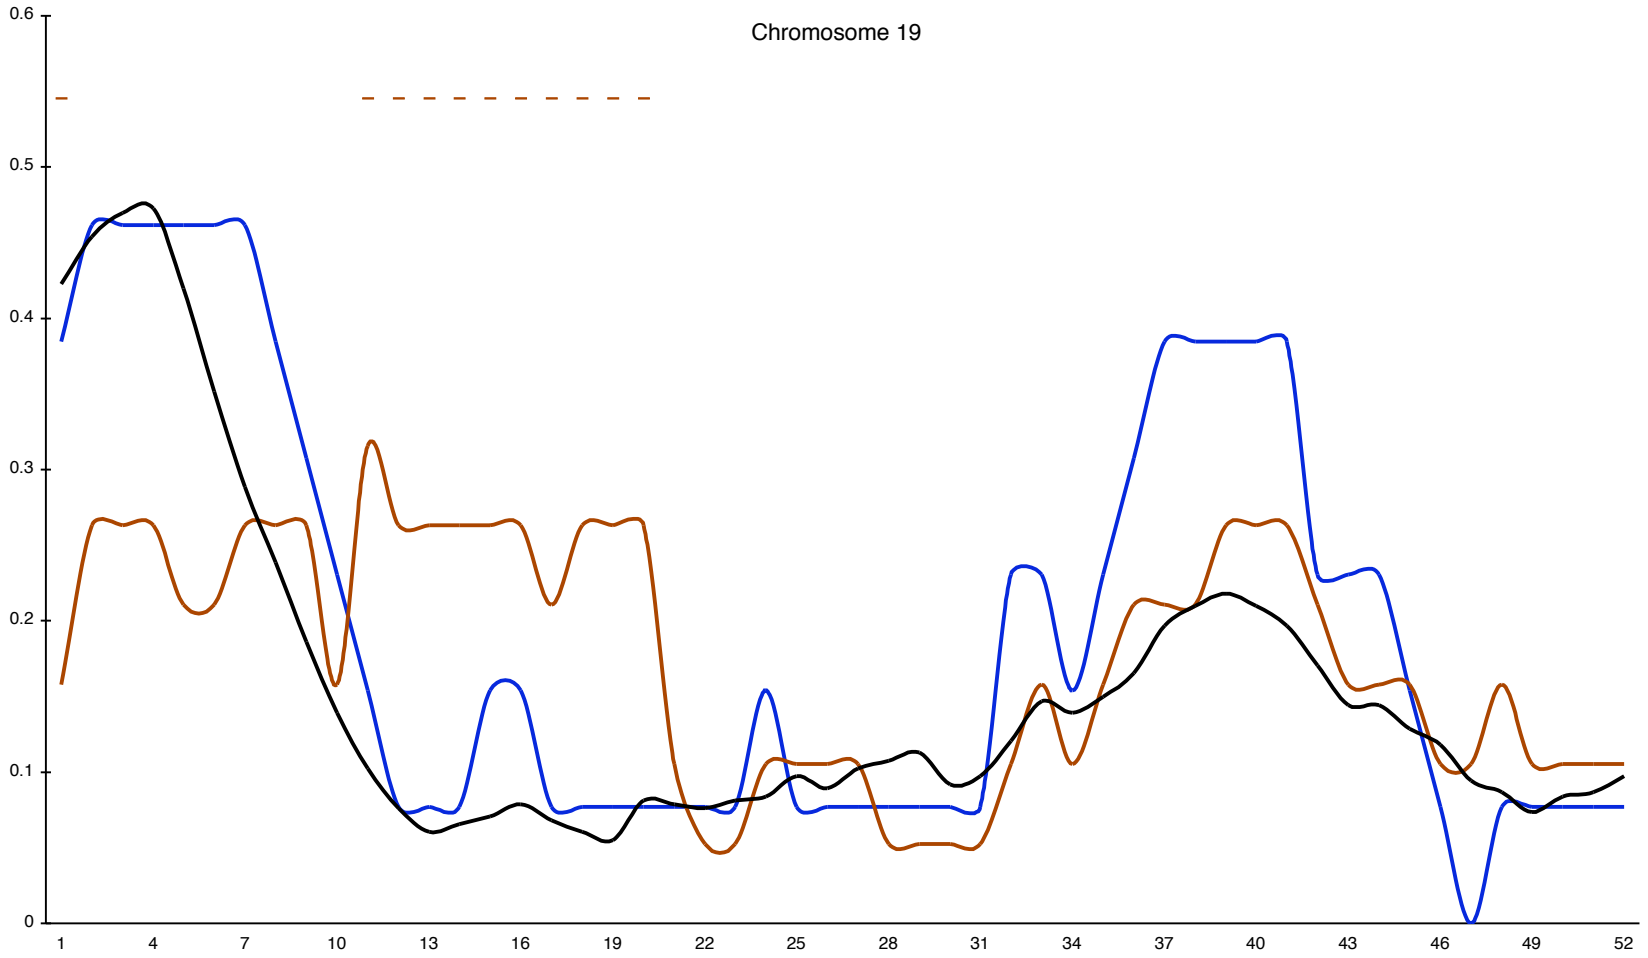

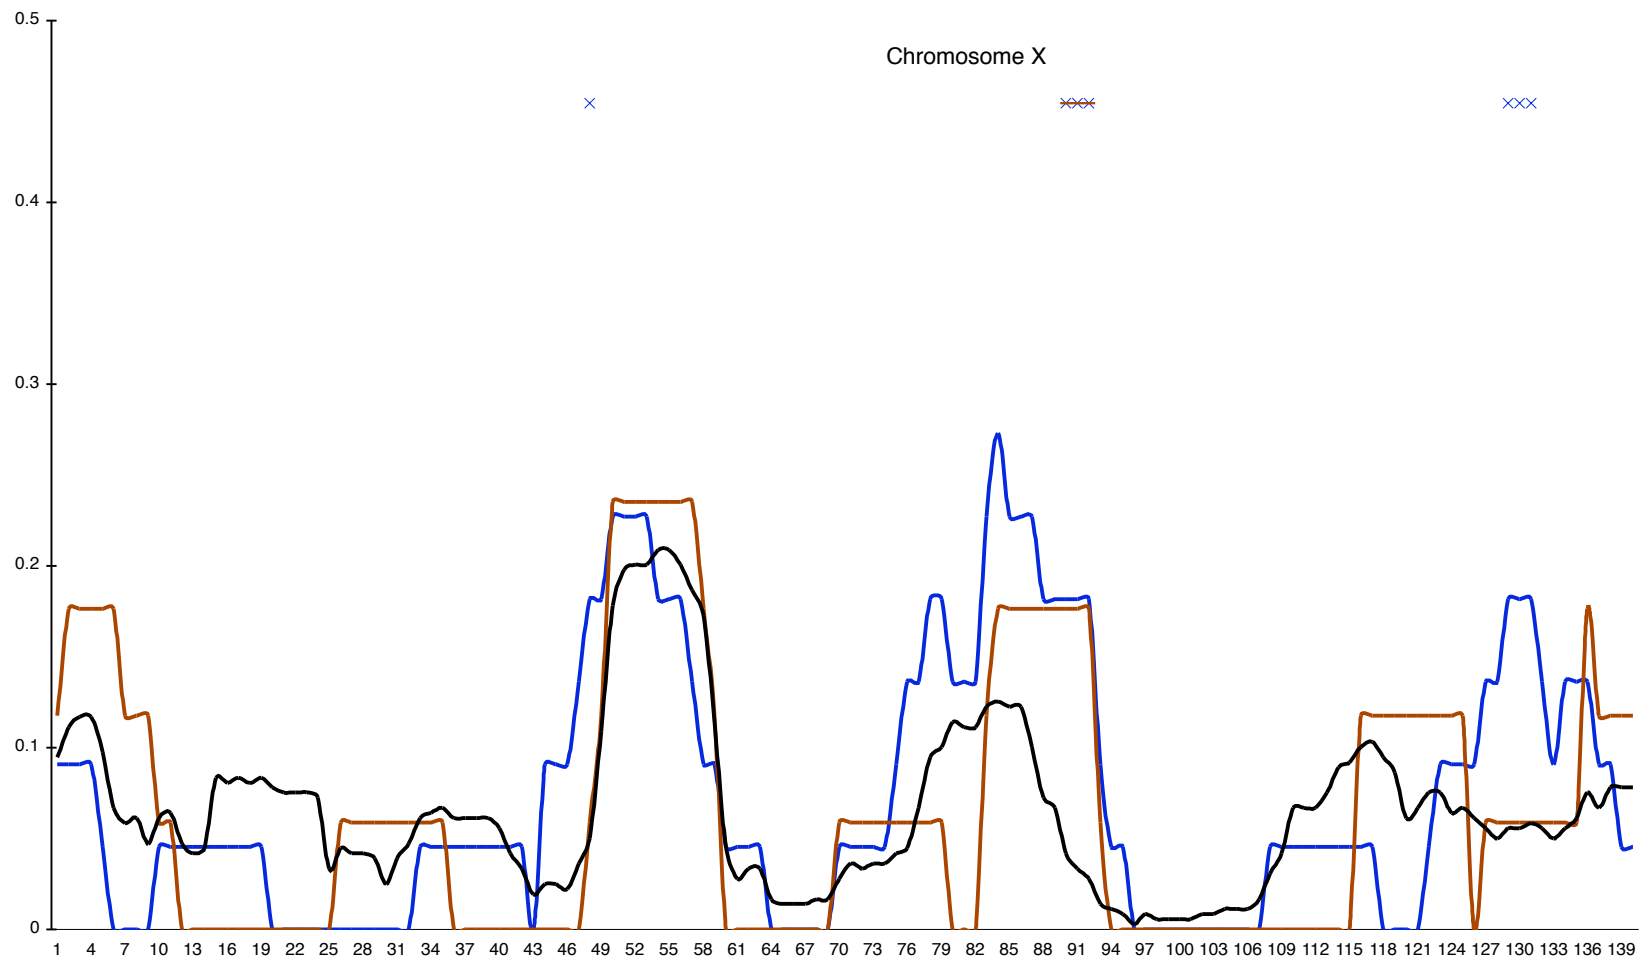

Supplement: pbio.0050309.sg002.pdf [file pbio.0050309.sg002.pdf]
