# Supplementary material
Source: PubMed Central journal article supplement (PMC2229852)

# A

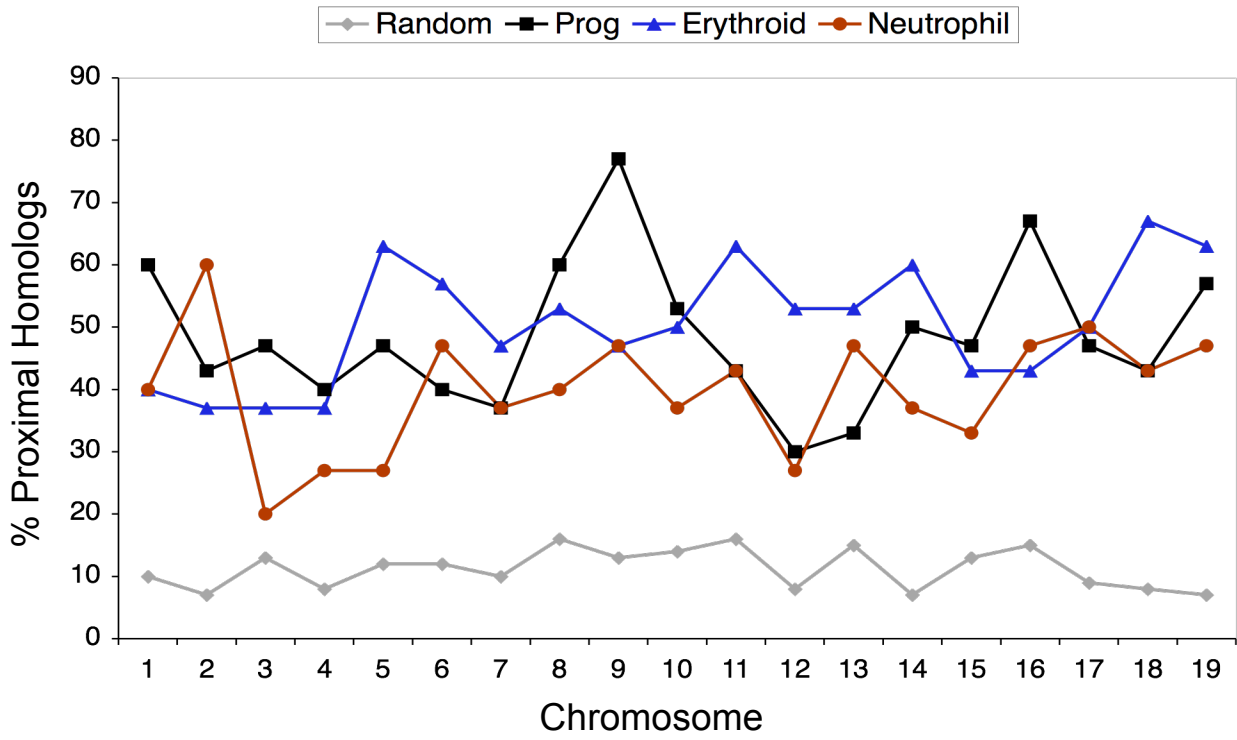

# B

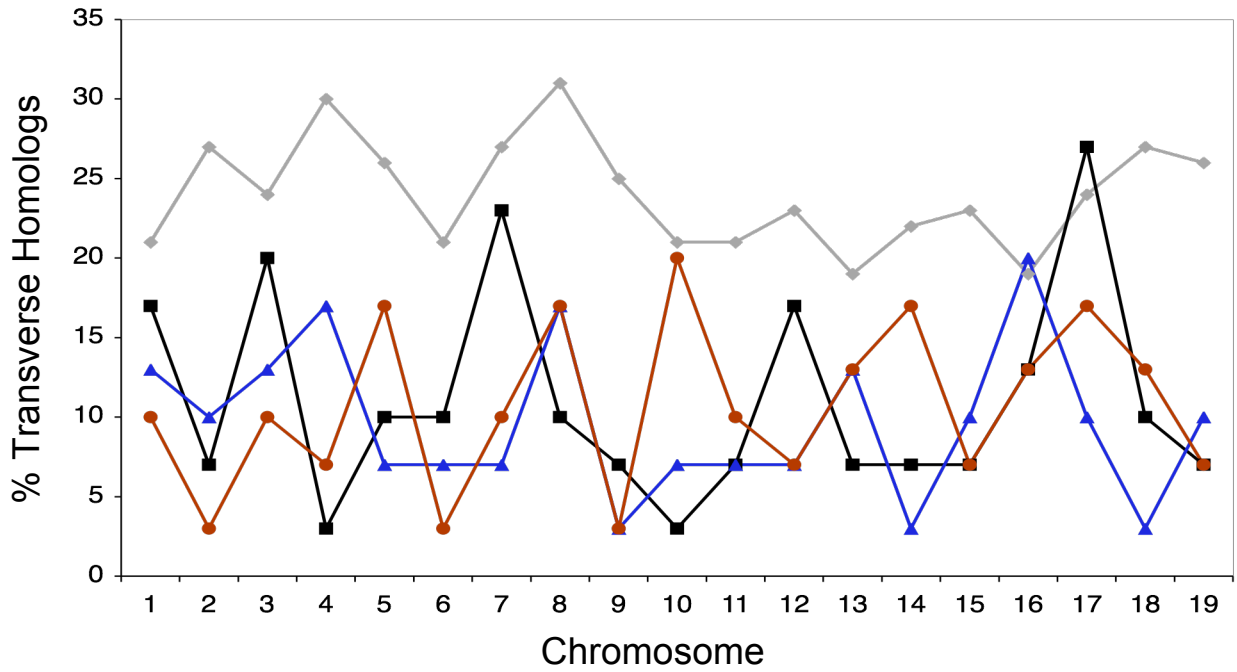

Supplement: pbio.0050309.sg009.pdf [file pbio.0050309.sg009.pdf]
